# Supplementary material
Source: Research Square preprint supplement (doi:10.21203/rs.3.rs-9152191/v1)
Supplement: Supplementary file 1 [file a94c93360546f79aab1e38d8.docx]

**Supplementary Material**

**Section S1. Sunspot rhythm parameters**

| **Subgroup** | **Model** | **Amplitude A** | **Period T years** | **Phase E years** |
| --- | --- | --- | --- | --- |
| WM | *r* = 0.31 | 0.157 (0.109 to 0.215)** | 7.9 (7.4 to 8.4)** | 2.9 (2.2 to 3.6)** |
| WF | *r* = 0.51 | 0.110 (0.0869 to 0.132)** | 15.8 (14.6 to 17.0)** | 0.1 (-1.0 to 0.9) |
| BM | *r* = 0.14 | 0.0689 (0.0113 to 0.127)* | 15.5 (11.1 to 19.8)** | 7.7 (5.4 to 9.9)** |
| BF | *r* = 0.20 | 0.0392 (0.0155 to 0.0629)** | 7.4 (6.6 to 8.3)** | 4.6 (3.6 to 5.7)** |
| APIM | *r* = 0.23 | 0.155 (0.0766 to 0.233)** | 12.0 (10.4 to 13.7)** | -0.43 (-2.27 to -0.43) |
| APIF | *r* = 0.12 | 0.0428 (0.0262 to 0.0830)* | 6.1 (5.2 to 7.0)** | -0.42 (-2.25 to -0.42) |
| AIAM | *r* = 0.22 | 0.399 (0.187 to 0.611)** | 11.9 (10.2 to 13.6)** | 5.5 (4.6 to 6.8)** |
| AIAF | NA | NA | NA | NA |
|  |  |  |  |  |
| **p < 0.001 |  |  |  |  |
| *p < 0.05 |  |  |  |  |

**Table S1. Sunspot suicide risk rhythm parameters for the 7 subgroups.** The ~8-, ~12-, and ~16-year sunspot rhythm periods were statistically distinct from one another. American Indian/Native Alaskan Males had a significantly greater sunspot amplitude than all other subgroups.

**Section S2. Abiding proportional modulation of (*m*, *d*).** Figures 1 and 6 assumes that the *intra*-subgroup linear and quadratic temporal differences in (*m*, *d*) coordinates that can occur over decades are consistent with the conservation of *tau*’s simultaneous proportional regulation of *m* and *d* over decades. Therefore, in order to test this assumption, the entire analysis was repeated with a new Model II in which Individual Suicide Risk *Ri(t)*for each subgroup was modeled from their raw data in Figure 1 as the sum of two independent terms: 1) an adjusted “monthly *m*” that was photoperiod-independent, or *mi(t)* = (*ai* + *bit* + *cit2*), and 2) an adjusted “monthly *d*” that was photoperiod-dependent, or *di(t)* = (*ei* + *fit*+*git*2)*cos((2p*t*/12) + *hi*). Validation of the assumption requires that in Model II, the adjusted “monthly *m*” and adjusted “monthly *d*” covary positively, continuously, and proportionally with each other over the 22 years even when their actual *m* may be increasing or decreasing significantly (Figure 1).

Consistent with the prediction, there was generally a continuous positive proportional relationship of about 6% between the adjusted “monthly *m*” and the adjusted “monthly *d*” in all subgroups (Figure S1). Model II 22-year means for both adjusted “monthly *m*” and adjusted “monthly *d*” were identical with those of the original. In addition, all AIC values were reduced, and all *r* values were increased in Model II. Thus, Model II validated the inference that *m* and *d* covaried continuously in a manner that was mostly positive and proportional with one another over 22 years and thus continued to display SCN *tau* regulation even during the linear and quadratic trends in Figure 1.

**Figure S1. Long-term proportional regulation of *m* and *d* together.** The 7 subgroups “instantaneous” *d* and *m* were modeled as above. *d* and *m* tend to maintain a relatively constant proportionality to one another of about 6% throughout the 22 years, except for American Indian/Alaskan Native Males, whose unusually large *d* in relation to their *m* was increasing proportionally faster, especially towards the second half of the 22 years.

**Section S3. On the ultradian forced desynchrony protocol.** The ultradian sleep-wake forced desynchrony protocol of the Eastman et al. group1 consists of a 3 – 5 day experiment involving continuous repetitive “T-cycles” (total light-dark LD cycle length) of 2.5 hours of wake/dim light and 1.5 hours of sleep/dark, which not only induces somewhat unnatural physiologic and psychologic stresses on subjects but is also much less well validated to estimate absolute intrinsic *tau* values compared with the gold standard forced desynchrony protocols (T-cycles of 11, 20, 28, or 42.85 hours for 2- to 4-weeks) from the Duffy et al. group2. In the gold standard protocols, multiple highly correlated measures of the circadian rhythm waveform (e.g. core temperature, plasma melatonin and cortisol rhythms) have validated the assessment of circadian timing and *tau* length. Thus, for example, upon initial release into any forced desynchrony protocol, there are inevitably aftereffects from the plastic effects of prior LD entrainment3 that confound such an early assessment of *tau* that is based on only 3 – 5 days. Theoretical model simulations indicate that up to 20 subjective days may be necessary for a relatively stable estimate of intrinsic *tau*4.

Consistent with these considerations is the fact that the Eastman et al. *tau* estimate for WM = 24.41 (N = 15) is rather at odds with the Duffy et al. gold standard estimate = 24.19 (N = 105). Similarly, the Eastman et al. *tau* estimate for WF = 24.24 (N = 16) is also rather at odds with the Duffy et al. estimate = 24.09 (N = 52). On the other hand, the Eastman et al. estimates for the shorter *tau* of BM (24.07, N = 16) and BF (24.07, N = 16) are closer to the extrapolated *tau* from the present suicide data (Fig S3), which involve tens of thousands of BM and BF suicide victims, and which suggest that BM *tau* may be closer to 24.112 and BF *tau* may indeed be 24.065. Possibly the Eastman ultradian protocol yields more accurate *tau* estimates at shorter *tau*. In any case, one major finding of the Eastman et al. studies is the that rank order of *tau* by Race (Black *tau* < White *tau*) appears, as it were, to have been validated by the suicide data (Figures S2, S3).

**Figure S2. The Race:Sex gradient in SCN *tau*.** The Males and Females of each respective Race have the same colors for visual clarity of the effects of Race. Subgroups percentages for each of the three categories were calculated by dividing their suicide risks by the maximum risk of the subgroup in each respective category: 1) mean annual suicide risk *m*, 2) photoperiod amplitude of suicide risk *d*, and 3) Sunspot Amplitude of suicide risk *SA*. For each Race, Males have higher risks in each category than their Female counterparts, and the rank ordering of suicide risk by Race tends to be preserved. WM and AIANM show a marked flip-flop in their photoperiod and sunspot amplitudes. These data are consistent with a Race:Sex gradient in SCN *tau* that 1) is maintained across *m* and *d*, and 2) was first described by Eastman.

**Figure S3. The extrapolated *tau* values for the subgroups with “missing” *tau* values.** Under the assumption that *m* scales exactly linearly with *tau*, the *tau* for the subgroups with “missing” *tau* were extrapolated from their *m* values by plotting these subgroup’s *m* according to the Duffy et al. slope in Figure 7 for White Males and Females. Extrapolated *tau* values were BM = 24.112, BF = 24.065, APIM = 24.104, APIF = 24.073, and AIANM = 24.158.

**Section S4. Is there any evidence that *tau* can vary positively with daylength in the natural solar LD photoperiod?** With regard to 1) the *relative* incremental changes in *tau* in the changing natural solar photoperiod, and hence, 2) the plasticity of *tau*, Eastman’s ultradian protocol appears to have yielded another important finding regarding the late-spring seasonal acrophase of *tau* that is consistent with the role of *tau* in the peak seasonality of suicide. Pittendrigh and Daan’s surprising and paradoxical finding5 that *increases* in photoperiod (LD) *decreases* *tau* in nocturnal rodents was seemingly contrary to Aschoff’s rule6, which states that increases in light intensity in constant light (LL) *increases* *tau* in nocturnal organisms. Assuming Pittendrigh’s paradoxical ‘photoperiod LD rule of *tau*’ bears some theoretical symmetry with Aschoff’s ‘constant light LL rule of *tau*,’ then Pittendrigh’s paradoxical finding would predict that *increases* in light intensity during LD *increases* *tau* in diurnal humans. In fact, this prediction was recently and clearly confirmed in a diurnal rodent species7. Although Jewett and Kronauer8 incorporated a *tau*-shortening effect of light intensity into their mathematical model of the light sensitivity of the SCN limit cycle oscillator in humans, this was based in part on the phase and amplitude responses of the SCN to bright light administered not only during the habitual light phase, but also during the habitual dark phase, thereby leaving unchallenged the inference that increases in light intensity/duration restricted to the light phase in LD lengthens human *tau*.

**Supplementary References**

1 Eastman, C. I., Tomaka, V. A. & Crowley, S. J. Sex and ancestry determine the free-running circadian period. *J. Sleep Res.* **26**, 547-550 (2017). <https://doi.org/> 10.1111/jsr.12521

2 Duffy, J. F. *et al.* Sex difference in the near-24-hour intrinsic period of the human circadian timing system. *Proc. Natl. Acad. Sci. U. S. A.* **108**, 115602-156608 (2011). <https://doi.org/10.1073/pnas.1010666108>

3 Burgess, H. J. & Eastman, C. I. Human tau in an ultradian light-dark cycle. *J. Biol. Rhythms* **23**, 374-376 (2008).

4 Klerman, E. B., Dijk, D. J., Kronauer, R. E. & Czeisler, C. A. Simulations of light effects on the human circadian pacemaker: implications for assessment of intrinsic period. *Am. J. Physiol.* **270**, R271-R282 (1996). <https://doi.org/10.1152/ajpregu.1996.270.1.R271>

5 Pittendrigh, C. S. & Daan, S. A functional analysis of circadian pacemakers in nocturnal rodents. I. The stability and lability of spontaneous frequency. *J. Comp. Physiol.* **106**, 223-252 (1976a). <https://doi.org/10.1007/BF01417856>

6 Aschoff, J. Exogenous and endogenous components in circadian rhythms. *Cold Spring Harb. Symp. Quant. Biol.* **25**, 11-27 (1960). <https://doi.org/10.1101/sqb.1960.025.01.004>

7 Bano-Otalora, B. *et al.* Bright daytime light enhances circadian amplitude in a diurnal mammal. *Proc. Natl. Acad. Sci. U. S. A.* **118**, e2100094118 (2021). <https://doi.org/10.1073/pnas.2100094118>

8 Jewett, M. E. & Kronauer, R. E. Refinement of a limit cycle oscillator model of the effects of light on the human circadian pacemaker. *J. Theor. Biol.* **192**, 455-465 (1998).
